# Supplementary material
Source: HighWire-hosted journal article supplement (https://bmjopen.bmj.com/content/15/5/e092725)
Supplement: inline-supplementary-material-1 [file inline-supplementary-material-1.pdf]

## The Full Search Strategy (Or Strategies) For All Databases

Title: **Survival status and Predictors of mortality among breast cancer patients in Ethiopia: A Systematic Review and Meta-analysis**

Search

### 1. PubMed

- MeSH Heading:
  - Breast cancer: "breast cancer," "breast neoplasm," "breast tumor," "mammary cancer," "outcomes of breast cancer," "breast malignancy,"
  - Mortality rate: "survival status," "survival rate," "mortality," "death," "mortality rate,"
  - Predictor: "predictors," "determinant," "risk factors,"

Combination: (((((((((((breast cancer[Title/Abstract]) OR (breast neoplasm[Title/Abstract])) OR (breast tumor[Title/Abstract])) OR (mammary cancer[Title/Abstract])) OR (outcome breast cancer[Title/Abstract])) ) OR (breast malignancy[Title/Abstract])) AND (mortality rate[Title/Abstract])) OR (survival status[Title/Abstract])) OR (mortality[Title/Abstract])) OR (death[Title/Abstract])) OR (mortality rate[Title/Abstract])) OR (survival rate[Title/Abstract])) ) AND (predictor[Title/Abstract]) OR (determinant[Title/Abstract]) OR (risk factor[Title/Abstract])) AND (Ethiopia[Title/Abstract])

- Date: 15/06/2024
- Number of Articles: 183

### 2. Google Scholar

- Advanced search:
 

**With all of the words** - Survival status and Predictors of mortality among breast cancer patients

**With the exact phrase** – breast cancer, Ethiopia

**With at least one of the words**- “breast neoplasm,” “breast tumor,” “mammary cancer,” “outcomes of breast cancer,” “breast malignancy,”

Date: 21/06/2024
- Number of articles: 236

### 3. Web Of Science

- Combination: "Breast cancer" OR "Breast carcinoma" OR "Breast neoplasm" OR "Breast Tumor" OR "Breast malignancy" OR "mammary cancer" OR "human mammary carcinoma" OR "malignant neoplasm of the breast" OR "human mammary neoplasm" (Topic) and "survival status" OR "survival rate" OR death OR "mortality rate" OR mortality and predictors OR determinant OR” risk factors” (Topic) and Ethiopia (Topic) and English (Languages)

- Date:28/07/2024
- Number of articles: 178

#### 4. Embase

- Combination: exp breast cancer/ OR Breast neoplasm. mp. OR exp breast carcinoma/ OR exp breast tumor/ OR Breast malignancy. mp. OR mammary cancer.mp OR human mammary carcinoma. mp. OR malignant neoplasm of Breast.mp. OR human mammary neoplasm. mp. AND mortality rate. mp. OR mortality. mp. OR death. mp. OR survival status. mp. OR survival rate. mp.AND exp Ethiopia/ or (Ethiopia).
- Date: 09/07/2024
- Number of articles: 47

#### 5. Scopus

- Combination: survival status AND predictors AND of AND mortality AND among AND breast AND cancer AND patients AND Ethiopia AND ( LIMIT-TO ( EXACT KEYWORD, "Human" ) ) AND ( LIMIT-TO ( LANGUAGE, "English" ) ) AND ( LIMIT-TO ( DOCTYPE, "ar" ) ) AND ( TITLE-ABS-KEY, "Ethiopia")
- Date: 15/07/2024
- Number of articles: 30
