# Supplementary material
Source: HighWire-hosted journal article supplement (https://bmjopen.bmj.com/content/15/5/e092725)
Supplement: inline-supplementary-material-3 [file inline-supplementary-material-3.pdf]

Table 2. Newcastle-Ottawa Quality Assessment Scale for cohort studies

| Authors, Publication year | Selection                                    |                                         |                               |                                                                              | Comparability                                                 | Outcome                       |                                                     |                                      | Total score | Quality * |
|---------------------------|----------------------------------------------|-----------------------------------------|-------------------------------|------------------------------------------------------------------------------|---------------------------------------------------------------|-------------------------------|-----------------------------------------------------|--------------------------------------|-------------|-----------|
|                           | Representativeness of the exposed cohort (*) | Selection of the non-exposed cohort (*) | Ascertainment of exposure (*) | Demonstration that outcome of interest was not present at start of study (*) | Comparability of cohorts based on the design or analysis (**) | Assessment of the outcome (*) | Was follow-up long enough for outcomes to occur (*) | Adequacy of follow-up of cohorts (*) |             |           |
| Feleke et al, 2022        | -                                            | *                                       | *                             | *                                                                            | *                                                             | *                             | *                                                   | *                                    | 7           | Good      |
| Misganaw et al, 2023      | *                                            | *                                       | *                             | *                                                                            | *                                                             | *                             | *                                                   | *                                    | 8           | Good      |
| Shita. et al, 2023        | *                                            | *                                       | *                             | *                                                                            | *                                                             | *                             | *                                                   | *                                    | 8           | Good      |
| Gashu et al, 2024         | *                                            | *                                       | *                             | *                                                                            | *                                                             | *                             | *                                                   | *                                    | 8           | Good      |
| Tiruneh et al, 2021       | *                                            | *                                       | -                             | *                                                                            | *                                                             | -                             | *                                                   | *                                    | 6           | Good      |
| Bacha et al, 2021         | *                                            | *                                       | *                             | *                                                                            | *                                                             | *                             | *                                                   | *                                    | 8           | Good      |
| Tesfay et al,2021         | *                                            | *                                       | -                             | *                                                                            | *                                                             | -                             | *                                                   | *                                    | 6           | Good      |
| Areri et al, 2019         | *                                            | *                                       | *                             | *                                                                            | *                                                             | -                             | *                                                   | *                                    | 8           | Good      |
| Belete et al, 2022        | *                                            | -                                       | *                             | *                                                                            | *                                                             | *                             | *                                                   | *                                    | 8           | Good      |
| Eber-Schulz et al, 2018   | -                                            | *                                       | *                             | *                                                                            | *                                                             | *                             | *                                                   | *                                    | 8           | Good      |
